# Supplementary material for: Serum Anti-Müllerian Hormone Levels and Risk of Premature Ovarian Insufficiency in Female Childhood Cancer Survivors: Systematic Review and Network Meta-Analysis
Source: MDPI journal article supplement (doi:10.3390/cancers13246331), 2021-12-16
Supplement: s1 [file s1]

## Tables S3 and S4

Table S3. SIDE analysis for mean AMH levels

| Side  | Direct   | Indirect | Difference | Coef.    | Std. Err. Coef. | Std. Err. Coef. | Std. Err. P> z |
|-------|----------|----------|------------|----------|-----------------|-----------------|----------------|
| A C * | .8821219 | .4840755 | .2056847   | 227.9047 | .6764372        | 227.9052        | 0.998          |
| B C * | 1.5      | 1.121028 | 1.764238   | 695.8296 | -.2642384       | 695.8308        | 1.000          |
| C D * | .4       | 1.042334 | -1.76493   | 599.6303 | 2.16493         | 599.6312        | 0.997          |

Table S4. SIDE analysis for POI incidence

| Side  | Direct    | Indirect | Difference | Coef.    | Std. Err. Coef. | Std. Err. Coef. | Std. Err. P> z |
|-------|-----------|----------|------------|----------|-----------------|-----------------|----------------|
| A D * | -2.044956 | 2.475975 | -1.88636   | 658.7511 | -.1585956       | 658.7558        | 1.000          |
| B D * | -1.973389 | 1.90217  | -2.634181  | 2191.441 | .6607922        | .6607922        | 1.000          |
| C D * | -2.911226 | 2.691189 | -2.790475  | 1700.67  | -.120751        | 1700.673        | 1.000          |
| D E * | -4.32e-10 | 3.00093  | 4.089859   | 6870.333 | -4.089859       | 6870.334        | 1.000          |
