# Supplementary material for: Serum Anti-Müllerian Hormone Levels and Risk of Premature Ovarian Insufficiency in Female Childhood Cancer Survivors: Systematic Review and Network Meta-Analysis
Source: MDPI journal article supplement (doi:10.3390/cancers13246331), 2021-12-16
Supplement: s1 [file s1]

**Table S3.** Quality scores of the studies included in the meta-analysis, assessed by the Newcastle-Ottawa scale.

|                   |      | Selection                                |                                     |                           |                                                                                      | Comparability <sup>a</sup>                                      | Outcome                   |                                            |                                  | Overall quality |
|-------------------|------|------------------------------------------|-------------------------------------|---------------------------|--------------------------------------------------------------------------------------|-----------------------------------------------------------------|---------------------------|--------------------------------------------|----------------------------------|-----------------|
| Author            | Year | Representativeness of the exposed cohort | Selection of the non-exposed cohort | Ascertainment of exposure | Demonstration that the outcome of interest was not present at the start of the study | Comparability of cohorts on the basis of the design or analysis | Assessment of the outcome | Was follow-up enough for outcomes to occur | Adequacy of follow-up of cohorts |                 |
| Nyström           | 2018 | *                                        | *                                   | *                         | *                                                                                    | **                                                              | *                         | *                                          | *                                | <b>9</b>        |
| Nies              | 2019 | *                                        | *                                   | *                         | *                                                                                    | **                                                              | *                         | *                                          | *                                | <b>9</b>        |
| Bath              | 2003 | 0                                        | *                                   | *                         | *                                                                                    | *                                                               | *                         | 0                                          | *                                | <b>6</b>        |
| Harzif            | 2020 | *                                        | *                                   | *                         | *                                                                                    | **                                                              | 0                         | *                                          | *                                | <b>8</b>        |
| Roshandel         | 2021 | *                                        | *                                   | 0                         | *                                                                                    | **                                                              | *                         | *                                          | *                                | <b>8</b>        |
| Utriainen         | 2019 | *                                        | *                                   | *                         | *                                                                                    | **                                                              | *                         | *                                          | *                                | <b>8</b>        |
| van der Kooi      | 2016 | *                                        | *                                   | 0                         | *                                                                                    | **                                                              | 0                         | *                                          | *                                | <b>7</b>        |
| Thomas-Teinturier | 2015 | *                                        | *                                   | 0                         | *                                                                                    | **                                                              | 0                         | *                                          | *                                | <b>7</b>        |

Newcastle-Ottawa scale for assessment of quality of included studies - cohort studies (each asterisk represents if individual criterion within the subsection was fulfilled). <sup>a</sup> Comparability of cohorts: for the most important factor: study controls adjusted for age; additional factor: study controls for BMI
