# Supplementary material for: Serum Anti-Müllerian Hormone Levels and Risk of Premature Ovarian Insufficiency in Female Childhood Cancer Survivors: Systematic Review and Network Meta-Analysis
Source: MDPI journal article supplement (doi:10.3390/cancers13246331), 2021-12-16
Supplement: s1 [file s1]

**Table S1. Detailed study search queries**

|                                                                                                                                                                                                                                                                                                                                                                                                                                                                                                                                                                             |
|-----------------------------------------------------------------------------------------------------------------------------------------------------------------------------------------------------------------------------------------------------------------------------------------------------------------------------------------------------------------------------------------------------------------------------------------------------------------------------------------------------------------------------------------------------------------------------|
| <b>MEDLINE (accessed through PubMed)</b>                                                                                                                                                                                                                                                                                                                                                                                                                                                                                                                                    |
| ("AMH"[All Fields] OR ("anti mullerian hormone"[MeSH Terms] OR ("anti mullerian"[All Fields] AND "hormone"[All Fields]) OR "anti mullerian hormone"[All Fields] OR ("anti"[All Fields] AND "mullerian"[All Fields] AND "hormone"[All Fields]) OR "anti mullerian hormone"[All Fields])) AND (("femal"[All Fields] OR "female"[MeSH Terms] OR "female"[All Fields] OR "females"[All Fields] OR "female s"[All Fields] OR "femals"[All Fields]) AND ("cancer survivors"[MeSH Terms] OR ("cancer"[All Fields] AND "survivors"[All Fields]) OR "cancer survivors"[All Fields])) |
| <b>EMBASE</b>                                                                                                                                                                                                                                                                                                                                                                                                                                                                                                                                                               |
| (amh OR 'anti-mullerian hormone'/exp OR 'anti-mullerian hormone' OR ('anti mullerian' AND ('hormone'/exp OR hormone))) AND ('female cancer survivors' OR (('female'/exp OR female) AND ('cancer'/exp OR cancer) AND ('survivors'/exp OR survivors)))                                                                                                                                                                                                                                                                                                                        |
| <b>SCOPUS</b>                                                                                                                                                                                                                                                                                                                                                                                                                                                                                                                                                               |
| TITLE-ABS-KEY ( ( amh OR anti-mullerian AND hormone OR anti Mullerian hormone) AND female AND cancer AND survivors )                                                                                                                                                                                                                                                                                                                                                                                                                                                        |
| <b>LILACS / Scielo.br</b>                                                                                                                                                                                                                                                                                                                                                                                                                                                                                                                                                   |
| (AMH or anti-mullerian hormone) and (female cancer survivors)                                                                                                                                                                                                                                                                                                                                                                                                                                                                                                               |
| <b>COCHRANE AT CENTRAL</b>                                                                                                                                                                                                                                                                                                                                                                                                                                                                                                                                                  |
| (AMH or anti-mullerian hormone) and (female cancer survivors)                                                                                                                                                                                                                                                                                                                                                                                                                                                                                                               |
| <b>CINAHL / PsycINFO / AMED / PsycExtra (accessed through EBSCO – IDEM for Italian Universities)</b>                                                                                                                                                                                                                                                                                                                                                                                                                                                                        |
| (AMH or anti-mullerian hormone) and (female cancer survivors) AND Cerca anche nel testo completo degli articoli; Applica argomenti equivalenti                                                                                                                                                                                                                                                                                                                                                                                                                              |
| <b>Clinicaltrials.gov / ICTRP (accessed through CENTRAL)</b>                                                                                                                                                                                                                                                                                                                                                                                                                                                                                                                |
| ((AMH or anti-mullerian hormone) and (female cancer survivors)):ti,ab,kw                                                                                                                                                                                                                                                                                                                                                                                                                                                                                                    |
